# Supplementary material for: Whole genome assessment of the retinal response to diabetes reveals a progressive neurovascular inflammatory response
Source: PubMed Central journal article supplement (PMC2442612; doi:10.1186/1755-8794-1-26), 2008-06-13
Supplement: 1755-8794-1-26-S3.pdf [file 1755-8794-1-26-S3.pdf]

### Neuronal Function Supplement

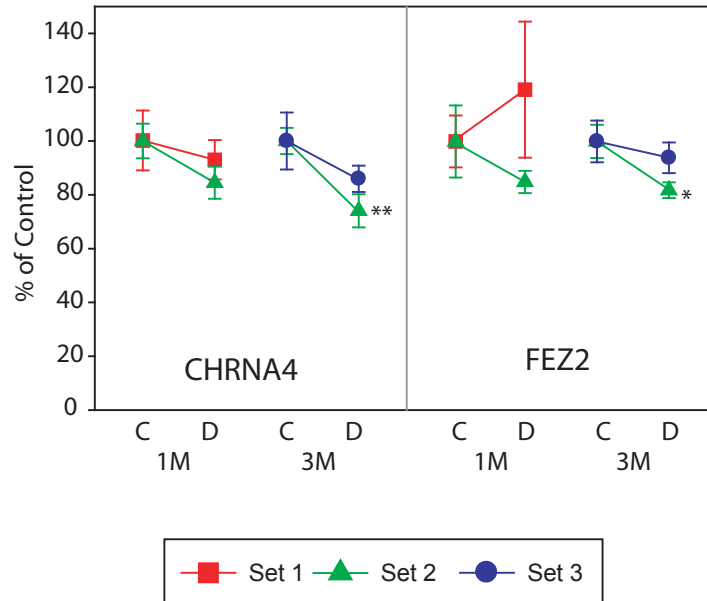

**Supplemental Figure 3: Neuronal function changes not validated by qPCR.** qPCR data is normalized to give mean control values of 1 and the different sets are color coded per the inset. T-test, \* $p < 0.05$ , \*\* $p < 0.01$ ,  $\Delta p < 0.001$ . CHRNA4, cholinergic receptor, nicotinic, alpha 4; FEZ2, fasciculation and elongation protein zeta 2.
