# Supplementary material for: Whole genome assessment of the retinal response to diabetes reveals a progressive neurovascular inflammatory response
Source: PubMed Central journal article supplement (PMC2442612; doi:10.1186/1755-8794-1-26), 2008-06-13

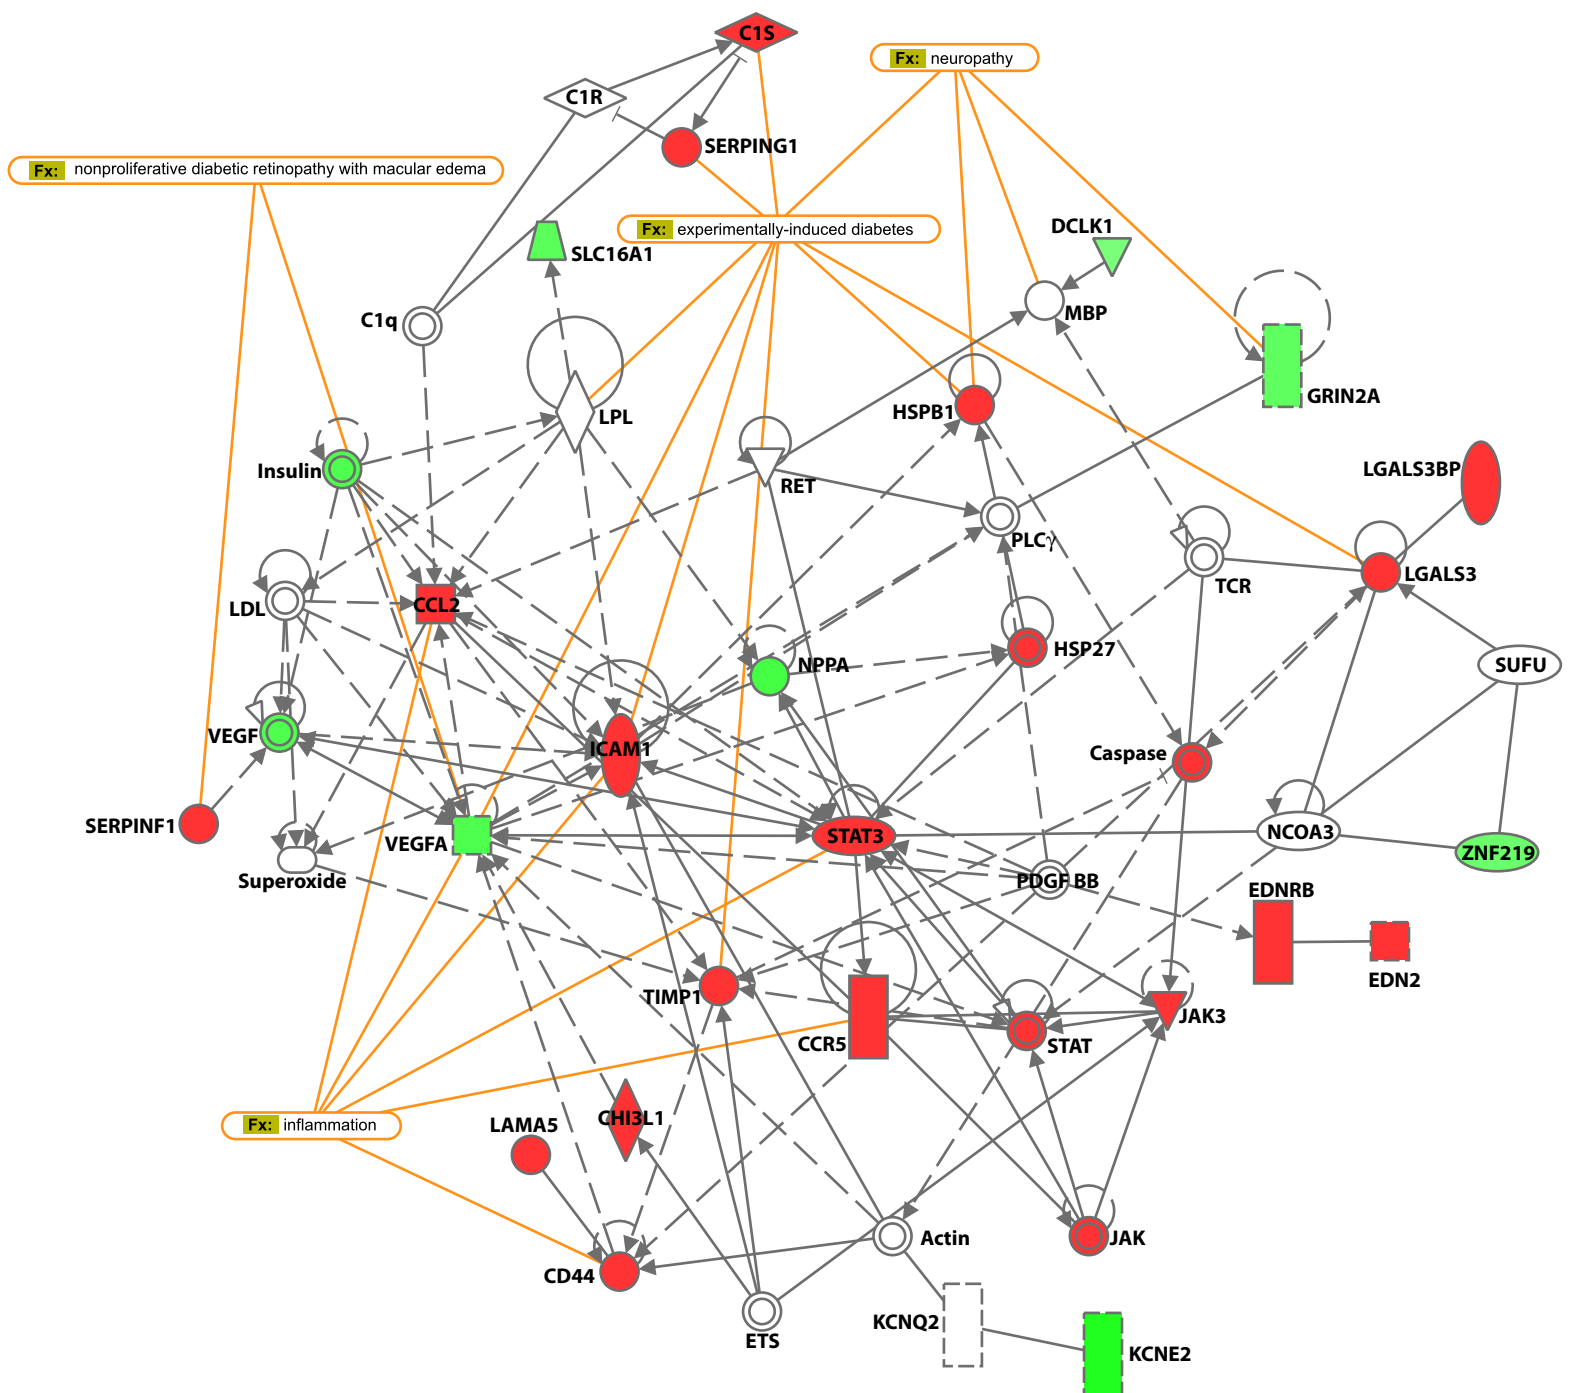

**Supplemental Figure 4** – Network analysis of confirmed changes. qPCR data from set 2 as well as insulin levels, caspase activity, and vascular permeability were combined to generate a network of interactions. Red shading corresponds to an increased level and green shading a decreased level. Unshaded molecules were not measured. 22 of the qPCR confirmed genes as well as insulin levels and caspase activity could be made into a network. Symbols for gene types and interactions are given in the figure. Pathological processes were overlaid to show interactions with known dysfunctions in disease.

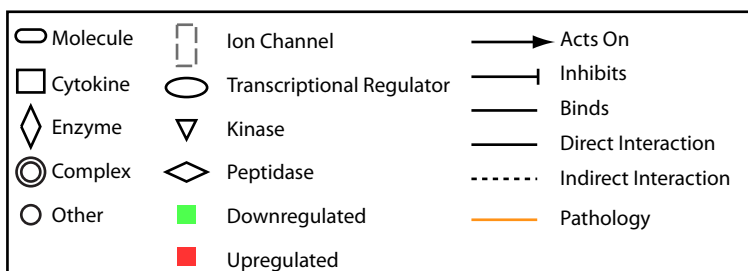

Supplement: 1755-8794-1-26-S4.pdf [file 1755-8794-1-26-S4.pdf]
